# Supplementary material for: Utilization of rehabilitation services for inpatient with cancer in Taiwan: a descriptive analysis from national health insurance database
Source: BMC Health Serv Res. 2012 Aug 16;12:255. doi: 10.1186/1472-6963-12-255 (PMC3465188; doi:10.1186/1472-6963-12-255)
Supplement: Additional file 1 — The department-specific components of rehabilitative services in 2008. [file 1472-6963-12-255-S1.xls]

## Sheet: 工作表1
	cancer				non-cancer
	PT	OT	ST	Sum	PT	OT	ST	Sum
PM&R	12480	10420	2560	25460	385700	352340	88580	1026620
row %	49.02	40.93	10.05	100	46.66	42.62	10.72	100
column %	12.1	27.42	37.98	17.21	32.23	56.63	73.35	42.62
Neurology	5300	1700	400	7400	135580	76500	12980	225060
row %	71.62	22.97	5.41	100	60.24	33.99	5.77	100
column %	5.14	4.47	5.93	5	11.33	12.3	10.75	11.6
Orthopadics	3140	900	0	4040	165080	26180	40	191300
row %	77.72	22.28	0	100	86.29	13.69	0.02	100
column %	3.04	2.37	0	2.73	13.8	4.21	0.03	9.86
Neurosurgery	12260	5740	760	18760	100720	44760	7080	152560
row %	65.35	30.6	4.05	100	66.02	29.34	4.64	100
column %	11.88	15.11	11.28	12.68	8.42	7.19	5.86	7.87
Plastic surgery	1420	500	0	1920	12740	21260	780	34780
row %	73.96	26.04	0	100	36.63	61.13	2.24	100
column %	1.38	1.32	0	1.3	1.06	3.42	0.65	1.79
Family Medicine	2640	2300	40	4980	28900	17780	2580	49260
row %	53.01	46.18	0.8	100	58.67	36.09	5.24	100
column %	2.56	6.05	0.59	3.37	2.42	2.86	2.14	2.54
Chest	10700	2260	620	13580	79400	15000	2060	96460
row %	78.79	16.64	4.57	100	82.31	15.55	2.14	100
column %	10.37	5.95	9.2	9.18	6.64	2.41	1.71	4.97
GI Med	2560	500	40	3100	10820	1900	440	13160
row %	82.58	16.13	1.29	100	82.22	14.44	3.34	100
column %	2.48	1.32	0.59	2.1	0.9	0.31	0.36	0.68
Hematology	15980	4840	940	21760	640	260	220	1120
row %	73.44	22.24	4.32	100	57.14	23.21	19.64	100
column %	15.49	12.74	13.95	14.71	0.05	0.04	0.18	0.06
General Surgery	5540	460	120	6120	28360	7040	60	35460
row %	90.52	7.52	1.96	100	79.98	19.85	0.17	100
column %	5.37	1.21	1.78	4.14	2.37	1.13	0.05	1.83
Urology	1740	400	0	2140	4260	2080	80	6420
row %	81.31	18.69	0	100	66.36	32.4	1.25	100
column %	1.69	1.05	0	1.45	0.36	0.33	0.07	0.33
Otolaryngology	5460	3080	100	8640	120	0	40	160
row %	63.19	35.65	1.16	100	75	0	25	100
column %	5.29	8.11	1.48	5.84	0.01	0	0.03	0.01
Colorectal Surgery	1420	0	0	1420	1060	280	20	1360
row %	100	0	0	100	77.94	20.59	1.47	100
column %	1.38	0	0	0.96	0.09	0.05	0.02	0.07
Thoracic Surgery	2400	60	0	2460	3020	740	80	3840
row %	97.56	2.44	0	100	78.65	19.27	2.08	100
column %	2.33	0.16	0	1.66	0.25	0.12	0.07	0.2
GI surgery	260	80	0	340	2040	1120	0	3160
row %	76.47	23.53	0	100	64.56	35.44	0	100
column %	0.25	0.21	0	0.23	0.17	0.18	0	0.16
Others	19860	4760	1160	25780	238220	54920	5720	298860
row %	77.04	18.46	4.5	100	79.71	18.38	1.91	100
column %	19.25	12.53	17.21	17.43	19.91	8.83	4.74	15.41
Total	103160	38000	6740	147900	1196660	622160	120760	1939580
row %	69.75	25.69	4.56	100	61.7	32.08	6.23	100
column %	100	100	100	100	100	100	100	100
